# Supplementary material for: Disseminating, implementing, and evaluating patient-centered outcomes to improve cardiovascular care using a stepped-wedge design: healthy hearts for Oklahoma
Source: PubMed Central journal article supplement (PMC5987433; doi:10.1186/s12913-018-3189-4), 2018-06-04
Supplement: 12913_2018_3189_MOESM2_ESM.pdf [file 12913_2018_3189_MOESM2_ESM.pdf]

## H2O Practice Member Survey

The purpose of this survey is to understand your perceptions of your work environment. No one will see any of your answers linked to your name. All responses to this survey will be reported only as summary results. Please answer each question by checking one box, like this  or this . If you are unsure about how to answer a question, please give the best answer you can.

1. **Practice name:** \_\_\_\_\_
2. **Member ID:** \_\_\_\_\_
3. **Practice Zip code:** \_\_\_\_\_
4. **Date: (mm/dd/yyyy)** \_\_\_\_/\_\_\_\_/\_\_\_\_

**Please rate your level of agreement with the following statements about your practice. (select only one response per question)**

|                                                                                    | Strongly Disagree(1)     | Disagree (2)             | Neutral(3)               | Agree(4)                 | Strongly Agree(5)        |
|------------------------------------------------------------------------------------|--------------------------|--------------------------|--------------------------|--------------------------|--------------------------|
| 5. Mistakes have led to positive changes here                                      | <input type="checkbox"/> | <input type="checkbox"/> | <input type="checkbox"/> | <input type="checkbox"/> | <input type="checkbox"/> |
| 6. I have many opportunities to grow in my work                                    | <input type="checkbox"/> | <input type="checkbox"/> | <input type="checkbox"/> | <input type="checkbox"/> | <input type="checkbox"/> |
| 7. People in our practice actively seek new ways to improve how we do things       | <input type="checkbox"/> | <input type="checkbox"/> | <input type="checkbox"/> | <input type="checkbox"/> | <input type="checkbox"/> |
| 8. People at all levels of this office openly talk about what is and isn't working | <input type="checkbox"/> | <input type="checkbox"/> | <input type="checkbox"/> | <input type="checkbox"/> | <input type="checkbox"/> |
| 9. Leadership strongly supports practice change efforts                            | <input type="checkbox"/> | <input type="checkbox"/> | <input type="checkbox"/> | <input type="checkbox"/> | <input type="checkbox"/> |
| 10. After trying something new, we take time to think about how it worked          | <input type="checkbox"/> | <input type="checkbox"/> | <input type="checkbox"/> | <input type="checkbox"/> | <input type="checkbox"/> |
| 11. Most of the people who work in our practice seem to enjoy their work           | <input type="checkbox"/> | <input type="checkbox"/> | <input type="checkbox"/> | <input type="checkbox"/> | <input type="checkbox"/> |
| 12. It is hard to get things to change in our practice                             | <input type="checkbox"/> | <input type="checkbox"/> | <input type="checkbox"/> | <input type="checkbox"/> | <input type="checkbox"/> |
| 13. This practice is a place of joy and hope                                       | <input type="checkbox"/> | <input type="checkbox"/> | <input type="checkbox"/> | <input type="checkbox"/> | <input type="checkbox"/> |
| 14. This practice learns from its mistakes                                         | <input type="checkbox"/> | <input type="checkbox"/> | <input type="checkbox"/> | <input type="checkbox"/> | <input type="checkbox"/> |
| 15. Practice leadership promotes an environment that is an enjoyable place to work | <input type="checkbox"/> | <input type="checkbox"/> | <input type="checkbox"/> | <input type="checkbox"/> | <input type="checkbox"/> |
| 16. People in this practice operate as a real team                                 | <input type="checkbox"/> | <input type="checkbox"/> | <input type="checkbox"/> | <input type="checkbox"/> | <input type="checkbox"/> |

|     |                                                                                                             | Strongly<br>Disagree <sup>(1)</sup> | Disagree <sup>(2)</sup>  | Neutral <sup>(3)</sup>   | Agree <sup>(4)</sup>     | Strongly<br>Agree <sup>(5)</sup> |
|-----|-------------------------------------------------------------------------------------------------------------|-------------------------------------|--------------------------|--------------------------|--------------------------|----------------------------------|
| 17. | When we experience a problem in the practice, we make a serious effort to figure out what's really going on | <input type="checkbox"/>            | <input type="checkbox"/> | <input type="checkbox"/> | <input type="checkbox"/> | <input type="checkbox"/>         |
| 18. | Leadership in this practice creates an environment where things can be accomplished                         | <input type="checkbox"/>            | <input type="checkbox"/> | <input type="checkbox"/> | <input type="checkbox"/> | <input type="checkbox"/>         |
| 19. | We regularly take time to reflect on how we do things                                                       | <input type="checkbox"/>            | <input type="checkbox"/> | <input type="checkbox"/> | <input type="checkbox"/> | <input type="checkbox"/>         |
| 20. | Most people in this practice are willing to change how they do things in response to feedback from others   | <input type="checkbox"/>            | <input type="checkbox"/> | <input type="checkbox"/> | <input type="checkbox"/> | <input type="checkbox"/>         |
| 21. | I can rely on the other people in this practice to do their jobs well                                       | <input type="checkbox"/>            | <input type="checkbox"/> | <input type="checkbox"/> | <input type="checkbox"/> | <input type="checkbox"/>         |
| 22. | Difficult problems are solved through face-to-face discussions in this practice                             | <input type="checkbox"/>            | <input type="checkbox"/> | <input type="checkbox"/> | <input type="checkbox"/> | <input type="checkbox"/>         |
| 23. | Members of this practice are able to bring up problems and tough issues                                     | <input type="checkbox"/>            | <input type="checkbox"/> | <input type="checkbox"/> | <input type="checkbox"/> | <input type="checkbox"/>         |

***EvidenceNOW Healthy Hearts for Oklahoma (H2O)*** is a project designed to help small primary care practices incorporate very recent evidence on how best to deliver cardiovascular disease prevention into their patients' care, including what is known as the ABCS: Aspirin use by high-risk individuals, Blood pressure control, Cholesterol management, and Smoking cessation.

To help with this change process, *EvidenceNOW H2O* will help your practice by offering the assistance of a practice facilitator, external consultants, peer support, and provide opportunities to participate in learning collaboratives. In addition, we will work with you to determine how best to monitor your performance on the ABCS measures.

**Please think carefully about the changes we described above.**

**Please select the response that best reflects your practice's readiness to engage in a change process that involves implementing the changes described above.**

|     |                                                  | Strongly<br>Disagree <sup>(1)</sup> | Disagree <sup>(2)</sup>  | Neutral <sup>(3)</sup>   | Agree <sup>(4)</sup>     | Strongly<br>Agree <sup>(5)</sup> |
|-----|--------------------------------------------------|-------------------------------------|--------------------------|--------------------------|--------------------------|----------------------------------|
| 24. | Our practice is ready to implement these changes | <input type="checkbox"/>            | <input type="checkbox"/> | <input type="checkbox"/> | <input type="checkbox"/> | <input type="checkbox"/>         |

The next set of questions help us understand your perceptions of how your practice addresses patients' needs. Please indicate your level of agreement with the following statements. (select only one response)

|                                                                                                   | Strongly Disagree <sup>(1)</sup> | Disagree <sup>(2)</sup>  | Neutral <sup>(3)</sup>   | Agree <sup>(4)</sup>     | Strongly Agree <sup>(5)</sup> |
|---------------------------------------------------------------------------------------------------|----------------------------------|--------------------------|--------------------------|--------------------------|-------------------------------|
| 25. Our practice does a good job of assessing patient needs and expectations                      | <input type="checkbox"/>         | <input type="checkbox"/> | <input type="checkbox"/> | <input type="checkbox"/> | <input type="checkbox"/>      |
| 26. Our practice uses data from patients to improve care                                          | <input type="checkbox"/>         | <input type="checkbox"/> | <input type="checkbox"/> | <input type="checkbox"/> | <input type="checkbox"/>      |
| 27. Our practice uses data on patient expectations and/or experience when developing new services | <input type="checkbox"/>         | <input type="checkbox"/> | <input type="checkbox"/> | <input type="checkbox"/> | <input type="checkbox"/>      |

Using your own definition of burnout, please indicate which of the following statements best describes how you feel about your situation at work. (select only one response)

28. <sub>1</sub> I enjoy my work. I have no symptoms of burnout
- <sub>2</sub> Occasionally I am under stress, and I don't always have as much energy as I once did, but I don't feel burned out
- <sub>3</sub> I am definitely burning out and have one or more symptoms of burnout, such as physical and emotional exhaustion
- <sub>4</sub> The symptoms of burnout that I'm experiencing won't go away. I think about frustrations at work a lot
- <sub>5</sub> I feel completely burned out and often wonder if I can go on practicing. I am at the point where I may need some changes

29. Are you a clinician (MD, DO, NP, or PA)?

No.... <sub>0</sub> ➔ If No, **SKIP** to question **36** (on page 6)

Yes... <sub>1</sub> If Yes, continue with question **30**, below.

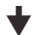

## NEW JNC8 HYPERTENSION TREATMENT GUIDELINES

In 2014, the JNC8 released new guidelines for treating patients with hypertension that included the following two major changes:

1. BP target for adults over age 60 was changed from <140/90 mmHg to <150/90 mmHg
2. Initial antihypertensive treatment should NOT include an ACE or ARB for black patients

**In the next set of questions, please rate your level of agreement regarding whether these new guidelines will lead to better outcomes for your hypertensive patients.**

### 30. BP target < 150/90 mmHg for patients over 60 years of age

- <sub>1</sub> This new guideline will improve outcomes for all of my patients
- <sub>2</sub> This new guideline will improve outcomes for some of my patients
- <sub>3</sub> This new guideline will have no impact on outcomes for my patients
- <sub>4</sub> This new guideline will have negative consequences for some of my patients
- <sub>5</sub> This new guideline will have negative consequences for all of my patients

### 31. Initial antihypertensive treatment should NOT include an ACE or ARB for black patients

- <sub>1</sub> This new guideline will improve outcomes for all of my patients
- <sub>2</sub> This new guideline will improve outcomes for some of my patients
- <sub>3</sub> This new guideline will have no impact on outcomes for my patients
- <sub>4</sub> This new guideline will have negative consequences for some of my patients
- <sub>5</sub> This new guideline will have negative consequences for all of my patients

## New ACC/AHA Statin Therapy Guidelines

In 2013, the American College of Cardiology and the American Heart Association released new guidelines for treating blood cholesterol to reduce atherosclerotic cardiovascular risk in adults. This included changes to prescribing statins. Statin therapy is now recommended for patients who meet one of the following criteria:

1. Diagnosed with clinical arteriosclerotic cardiovascular disease (ASCVD)
2. Primary elevation of LDL  $\geq 190$ mg/dL
3. Diagnosed with DM, between 40-75 years old, with LDL between 70-189 mg/dL, and no diagnosis of ASCVD, or
4. No diagnosis of ASCVD or DM, with LDL 70-189 mg/dL and an estimated 10-year ASCVD risk  $\geq 7.5\%$

**Please rate your level of agreement regarding whether these new guidelines will lead to better outcomes for your patients.**

**32. Patients diagnosed with ASCVD should be prescribed a statin**

- <sub>1</sub> This new guideline will improve outcomes for all of my patients
- <sub>2</sub> This new guideline will improve outcomes for some of my patients
- <sub>3</sub> This new guideline will have no impact on outcomes for my patients
- <sub>4</sub> This new guideline will have negative consequences for some of my patients
- <sub>5</sub> This new guideline will have negative consequences for all of my patients

**33. Patients with a primary elevation of LDL >190mg/dL should be prescribed a statin**

- <sub>1</sub> This new guideline will improve outcomes for all of my patients
- <sub>2</sub> This new guideline will improve outcomes for some of my patients
- <sub>3</sub> This new guideline will have no impact on outcomes for my patients
- <sub>4</sub> This new guideline will have negative consequences for some of my patients
- <sub>5</sub> This new guideline will have negative consequences for all of my patients

**34. Patients with a diagnosis of DM, between 40-75 years old, with LDL between 70-189 mg/dL, and no diagnosis of ASCVD should be prescribed a statin**

- <sub>1</sub> This new guideline will improve outcomes for all of my patients
- <sub>2</sub> This new guideline will improve outcomes for some of my patients
- <sub>3</sub> This new guideline will have no impact on outcomes for my patients
- <sub>4</sub> This new guideline will have negative consequences for some of my patients
- <sub>5</sub> This new guideline will have negative consequences for all of my patients

**35. Patients with no diagnosis of ASCVD or DM, with LDL 70-189 and an estimated 10-year ASCVD risk  $\geq$ 7.5% should be prescribed a statin**

- <sub>1</sub> This new guideline will improve outcomes for all of my patients
- <sub>2</sub> This new guideline will improve outcomes for some of my patients
- <sub>3</sub> This new guideline will have no impact on outcomes for my patients
- <sub>4</sub> This new guideline will have negative consequences for some of my patients
- <sub>5</sub> This new guideline will have negative consequences for all of my patients

**Please complete the following information about yourself.**

36. **What is your role in this practice?** (select only one option)

- <sub>1</sub> Physician (MD, DO)
- <sub>2</sub> Nurse Practitioner or Physician Assistant
- <sub>3</sub> Clinical staff (e.g., RN, LPN, MA, CMA, Behavioral health providers)
- <sub>4</sub> Non-clinical staff (e.g., receptionist, billing staff)
- <sub>5</sub> Office manager
- <sub>6</sub> Other

↳ 36a. If “Other” role was checked, please specify: \_\_\_\_\_

37. **How many years have you worked in this practice?**

Please round to the nearest year. If you have worked in the practice less than one year, please indicate that by checking that response option.

\_\_\_\_\_ years    OR     I have worked in this practice less than one year.

38. **How many hours per week do you work at this practice?**

\_\_\_\_\_ hours/week

*Thank you for taking the time to complete this survey.*
